# Supplementary material for: Validierung des Düsseldorfer Screeningtools: ein traitbasierter Ansatz zur Erfassung der psychischen Belastung von Krebspatienten
Source: Springer Nature journal article supplement (doi:10.1007/s00106-020-00980-4), 2020-12-18
Supplement: MOESM1 [file 18700156]

## Stichprobenbeschreibung: Geschlecht, Familienstand und Krankheitsbild

| <b>Anteil der Patienten in %</b> |      |
|----------------------------------|------|
| <b>Geschlecht</b>                |      |
| weiblich                         | 40 % |
| männlich                         | 60 % |
| <b>Familienstand</b>             |      |
| ledig                            | 11 % |
| in einer Beziehung               | 7%   |
| verheiratet                      | 56 % |
| verwitwet                        | 16%  |
| geschieden                       | 10%  |
| <b>Tumorlokalisation</b>         |      |
| Lippe                            | 5%   |
| Zungenrund                       | 2%   |
| Zunge                            | 18%  |
| Zahnfleisch                      | 9%   |
| Mundboden                        | 18%  |
| Gaumen                           | 2%   |
| Sonstige Bereiche des Mundes     | 8%   |
| Parotis                          | 2%   |
| Oropharynx                       | 2%   |
| mehrere Teilbereiche überlappend | 27%  |
| Kopf                             | 5%   |
| Auge                             | 1%   |
| Ohr                              | 1%   |
