# Supplementary material for: Validierung des Düsseldorfer Screeningtools: ein traitbasierter Ansatz zur Erfassung der psychischen Belastung von Krebspatienten
Source: Springer Nature journal article supplement (doi:10.1007/s00106-020-00980-4), 2020-12-18
Supplement: MOESM2 [file 18700156]

Tabelle 1: Skala 1 Ressourcendefizite

| Items                                                                                               | M    | SD   | $r_{it}$ |
|-----------------------------------------------------------------------------------------------------|------|------|----------|
| 3. Ich bekomme leicht das Gefühl, in Panik zu geraten.                                              | 1.92 | .89  | .55      |
| 4. Ich fühle mich häufig allein gelassen.                                                           | 1.66 | .94  | .33      |
| 5. Im Umgang mit anderen fühle ich mich unsicher.                                                   | 1.52 | .80  | .62      |
| 6. Ich fühle mich antriebslos.                                                                      | 1.68 | .82  | .64      |
| 8. Es sind Einschränkungen durch die Erkrankung eingetreten, mit denen ich nur schwer umgehen kann. | 2.39 | 1.06 | .68      |
| 9. Ich fühle mich ständig gestresst.                                                                | 1.52 | .69  | .58      |
| 10. Den Verlauf meiner Erkrankung kann ich durch nichts beeinflussen.                               | 2.31 | 1.01 | .47      |
| 11. Ich grübele oft über mein Leben nach.                                                           | 2.50 | 1.00 | .57      |
| 12. Ich habe das Gefühl wertlos zu sein.                                                            | 1.32 | .79  | .45      |
| 15. Nach einem Rückschlag erhole ich mich nur schwer.                                               | 2.37 | .92  | .46      |
| 16. Ich bin häufig niedergeschlagen.                                                                | 1.90 | .918 | .81      |
| 17. Niemand versteht, wie schlecht es mir geht.                                                     | 1.68 | .845 | .68      |
| 19. Es ist schwierig für mein Umfeld, sich in meine Situation hineinzusetzen.                       | 2.15 | .95  | .63      |
| 21. Ich habe kein Interesse mehr an Dingen, die ich früher gern gemacht habe.                       | 1.81 | .93  | .66      |
| 22. Ich fühle mich durch meine körperlichen Beschwerden im Alltag eingeschränkt.                    | 2.39 | 1.06 | .65      |
| 23. Ich ziehe mich von anderen Menschen zurück, wenn es mir schlecht geht.                          | 2.10 | 1.08 | .56      |
| 24. Ich rege mich schnell über andere Menschen auf.                                                 | 1.98 | .89  | .49      |
| 28. Ich fühle mich im Alltag oft überfordert.                                                       | 1.89 | .89  | .78      |
| 29. Durch meine Erkrankung bin ich in meinem religiösen Glauben erschüttert.                        | 1.42 | .933 | .59      |
| 30. Ich bin sehr angespannt.                                                                        | 2.16 | .89  | .66      |

Anmerkung: M=Mittelwert; SD=Standardabweichung;  $r_{it}$ =Itemtrennschärfe

Tabelle 2: Skala 2 positive Ressourcen

| Items                                                                      | M    | SD  | r <sub>it</sub> |
|----------------------------------------------------------------------------|------|-----|-----------------|
| 1. Auch in schwierigen Zeiten erwarte ich normalerweise das Beste.         | 3.10 | .78 | .44             |
| 2. Ich verfolge meine Ziele energisch.                                     | 3.04 | .65 | .39             |
| 6. Ich kämpfe entschlossen gegen meine Erkrankung an.                      | 3.70 | .64 | .40             |
| 13. Wenn andere Probleme haben, bin ich gerne für sie da.                  | 3.30 | .75 | .30             |
| 14. Ich genieße jeden Moment, in dem es mir gut geht.                      | 3.62 | .62 | .68             |
| 18. Meine Zukunft sehe ich immer optimistisch.                             | 3.30 | .88 | .63             |
| 20. Ich kann durch mein eigenes Verhalten etwas an meinem Befinden ändern. | 3.00 | .82 | .32             |
| 25. Ich war mit meinem bisherigen Leben im Allgemeinen zufrieden.          | 3.51 | .58 | .59             |
| 26. Wenn es mir nicht gut, ist immer jemand für mich da.                   | 3.42 | .67 | .40             |
| 27. Ich habe mir für mein Leben noch viel vorgenommen.                     | 3.09 | .95 | .44             |

Anmerkung: M=Mittelwert; SD=Standardabweichung; r<sub>it</sub>=Itemtrennschärfe

Tabelle 3: subjektiver Unterstützungsbedarf

| Item                                                             | M    | SD  | r <sub>it</sub> |
|------------------------------------------------------------------|------|-----|-----------------|
| 31. Ich brauche keine Hilfe, um meine Erkrankung zu verarbeiten. | 2.06 | .97 | .05             |
| 32. Ich wünsche mir einen Termin in einer Beratungsstelle.       | 1.60 | .93 | .45             |
| 33. Ich wünsche mir Anschluss an eine Selbsthilfegruppe.         | 1.47 | .65 | .51             |
| 34. Ich wünsche mir Unterstützung durch einen Pfarrer.           | 1.24 | .98 | .14             |

Anmerkung: M=Mittelwert; SD=Standardabweichung; r<sub>it</sub>=Itemtrennschärfe
